# Supplementary material
Source: publisher site journal article supplement (https://www.dovepress.com/get_supplementary_file.php?f=359956.docx)
Supplement: Supplementary file 1 [file get_supplementary_file.php]

Supplementary Table1. Survival rates grouped by clinical prognostic indices

|  | **1-year OS** | **3-year OS** | **5-year OS** |
| --- | --- | --- | --- |
| **NCCN-IPI risk group (95% CI)** | | | |
| Low | 100.0% (100.0%-100.0%) | 83.3% (58.3%-100.0%) | 66.7% (37.9%-100.0%) |
| LI | 89.1% (81.2%-97.7%) | 76.4% (65.9%-88.5%) | 70.8% (59.7%-83.9%) |
| HI | 83.3% (74.8%-92.8%) | 60.3% (49.5%-73.4%) | 52.3% (41.4%-66.0%) |
| High | 51.6% (36.7%-72.6%) | 25.8% (14.2%-46.9%) | 22.6% (11.8%-43.3%) |
| **IPI risk group (95% CI)** | | | |
| Low | 90.0% (82.1%-98.7%) | 76.0% (65.0%-88.8%) | 71.9% (60.4 %-85.5%) |
| LI | 90.5% (78.8%-100%) | 85.7% (72.0%-100.0%) | 71.4% (54.5%-93.6%) |
| HI | 89.7% (80.7%-99.8%) | 58.3% (44.6%-76.2%) | 53.0% (39.3%-71.5%) |
| High | 56.3% (43.8%-72.2%) | 33.3% (22.3%-49.7%) | 26.5%(16.4%-42.7%) |
| **E-IPI risk group (95% CI)** | | | |
| Low | 93.3% (87.2%-99.9%) | 78.3% (68.6%-89.5%) | 71.6% (61.0%-84.0%) |
| LI | 86.7% (75.3%-99.7%) | 76.7% (62.9%-93.4%) | 73.3% (59.1%-91%) |
| HI | 84.4% (72.7%-97.9%) | 49.1% (34.3%-70.2%) | 39.0% (25.1%-60.8%) |
| High | 47.2% (33.4%-66.7%) | 25.0% (14.2%-44.0%) | 18.8% (9.4%-37.5%) |

**IPI:** International prognostic index; **NCCN-IPI:** National Comprehensive Cancer Network-International prognostic index; **E-IPI:** Elderly-International prognostic index; **LI**: low-intermediate; **HI**: high-intermediate.
